# Supplementary material
Source: publisher site journal article supplement (https://www.dovepress.com/article/389471)
Supplement: Supplementary file 1 [file get_supplementary_file.php]

**Supplementary Figures**


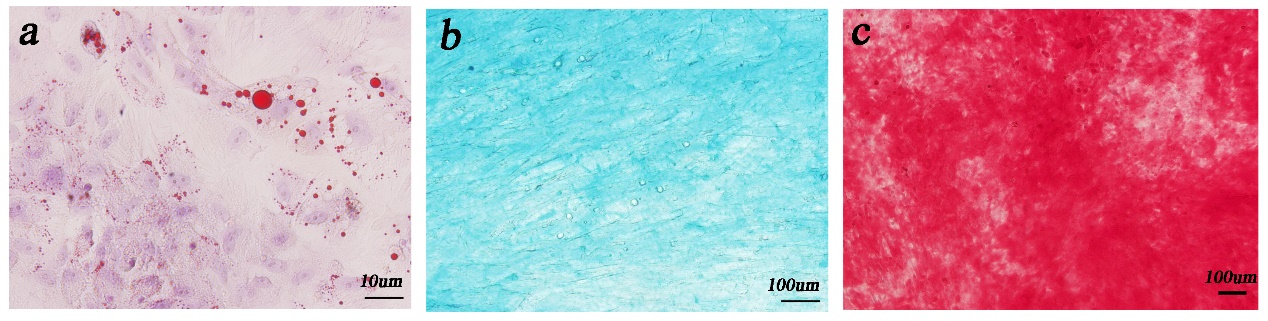


**Supplementary Figure 1**. hUC-MSCs showed muti-lineage differentiation of (a)adipogenesis, (b)chondrogenesis and (c)osteogenesis.


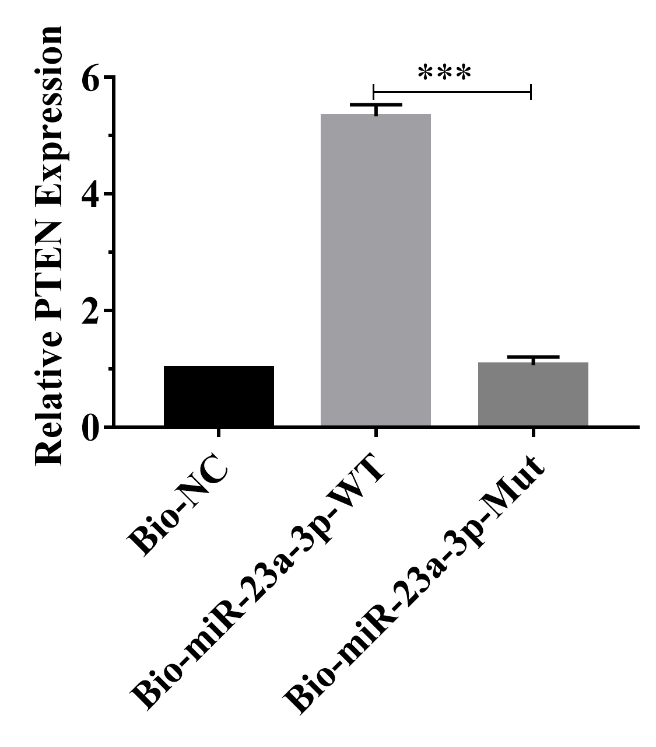


**Supplementary Figure 2.** The relationship of PTEN and miR-23a-3p was tested by pull-down assay, ***P < 0.001.


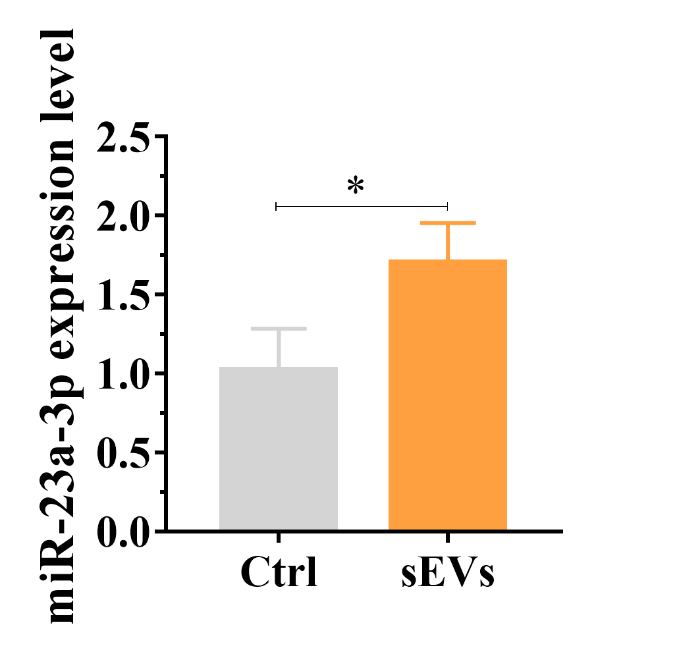


**Supplementary Figure 3.** HUVECs were cultured with sEVs for 24h, then qPCR was used to measure miR-23a-3p expression level in cells. Three independent replicates have been statistical analysis. *p < 0.05.


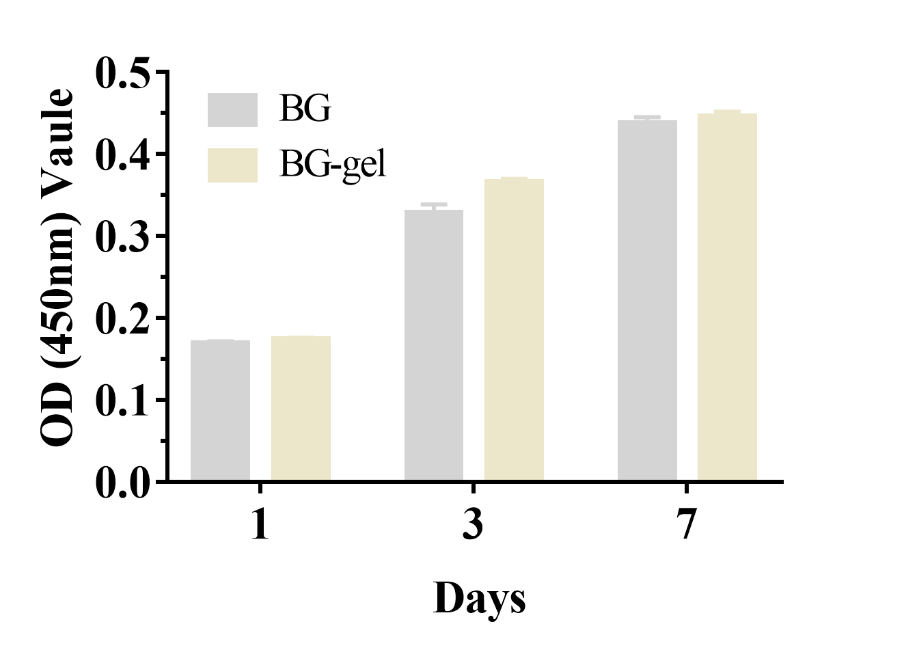


**Supplementary Figure 4.** (b) CCK-8 assay of BMSCs cultured on BG and BG-gel scaffolds.


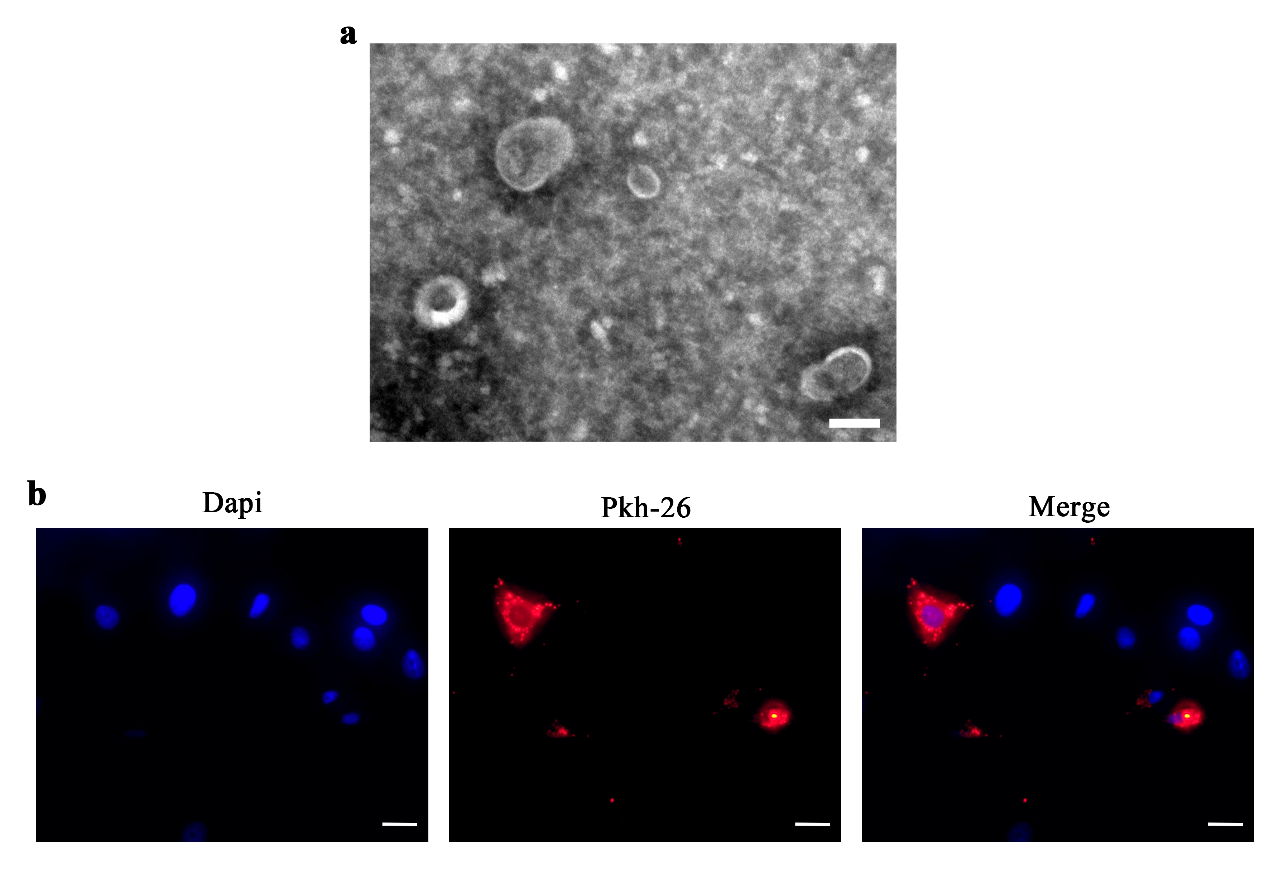


**Supplementary Figure 5**. (a) Morphology of sEVs from degraded BG scaffold with Gelma/nanoclay hydrogel coatings was visualized under transmission electron microscopy (TEM). Scale bar:100um. (b)Representative fluorescence micrograph of PKH-26 (red)-labelled sEVs from the composited scaffold were incubated with BMSCs for 24 h. Scale bar:25um.

**Supplementary table 1:** The sequence of the primers.

| Gene | Sequences |
| --- | --- |
| OCN | F-5’-CTCACAGATGCCAAGCCCA-3’ |
| R-5’-CAAGGTAGCGCCGGAGTCT-3’ |
| ALP | F-5’-TCCTGACCAAAAACCTCAAAGG-3’ |
| R-5’-TGCTTCATGCAGAGCCTGC-3’ |
| BMP-2 | F-5’-ACTACCAGAAACGAGTGGGAA-3’ |
| R-5’-GCATCTGTTCTCGGAAAACCT-3’ |
| mGAPDH | F-5’-AGGTCGGTGTGAACGGATTTG-3’ |
| R-5’-TGTAGACCATGTAGTTGAGGTCA-3’ |

**Supplementary table 2:** The sequence of antagomir-23a-3p and scramblemir.

| Name | Sequences |
| --- | --- |
| Antagomir-23a-3p | 5’-GGAAAUCCCGGCAAUGUGAU-3’ |
| Scramblemir | 5’-CAGUACUUUUGUGUAGUACAA-3’ |
